# Supplementary material for: Endogenous noise of neocortical neurons drives atypical sensoryresponse variability in autism
Source: Research Square preprint supplement (doi:10.21203/rs.3.rs-2572651/v1), 2023-03-20
Supplement: Supplementary file 1 [file 3dc369d1b7130a422c4616b1.xlsx]

## Sheet: Data Summary
Categories	Parameters	WT	WT	KO	KO	KO-BMS	KO-BMS		Normal Distribution (Shapiro-Wilk Normality Test)	Stats	Significance				Comments
		Mean±SD	n	Mean±SD	n	Mean±SD	n				WT vs KO	WT vs KO-BMS	KO vs KO-BMS
Intrinsic excitability	resting Vm (mV)	-72.02±9.048	13	-77.79±9.66	19	-77.518±8.788	13		No	Mann Whitney Test	n.s.	n.s.	n.s.		same as downstate Vm (mV)
	Ri (Mohm)	104.44±38.18	17	137.50±66.68	17	82.313±24.22	12		No	Mann Whitney Test	n.s.	n.s.	0.03		calculated from voltage response to -100 pA current step
	rheobase (pA)	264.71±106.77	17	202.94±96.20	17	300±79.77	11		No	Mann Whitney Test	n.s.	n.s.	0.034
	AP threshold (mV)	-33.98±8.39	17	-38.33±10.34	17	-32.735±7.825	11		Yes	Unpaired t-test	n.s.	n.s.	n.s.
	AP halfwidth (ms)	1.83±0.387	12	2.418±0.665	15	1.831±0.248	8		Yes	Unpaired t-test	0.012497	n.s.	0.026804		1st AP from IV curve
	max AP firing frequency (Hz)	16±7.23	13	22.23±6.92	17	20.67±11.93	12		No	Mann Whitney Test	0.0278	n.s.	n.s.
	1st AP half-width (ms)	1.899±0.368	11	2.58±0.907	13	1.934±0.382	8		Yes	Unpaired t-test	0.036073	n.s.	n.s.		1st AP from train of 3 APs from an IV protocol
	3rd AP half-width (ms)	2.479±0.711	11	3.394±1.65	12	2.395±0.553	8		No	Mann Whitney Test	n.s.	n.s.	n.s.		3rd AP from train of 3 APs from an IV protocol
	ratio 3rd AP/1st AP (half-width)	1.289±0.183	11	1.314±0.344	12	1.314±0.352	9		No	Mann Whitney Test	n.s.	n.s.	n.s.		3rd AP/1st AP from the above two conditions (IV protocol)
	ADP amplitude (mV)	1.557±0.599	6	2.447±0.57	7	3.05±1.816	5		Yes	Unpaired t-test	0.028357	n.s.	n.s.		from train of 3 APs at 40 Hz
	AP accommodation (4th SI/ 1st SI)	11.42±13.62	5	8.41±9.18	6	3.578±3.942	5		No	Mann Whitney Test	n.s.	n.s.	n.s.		Current steps with 5 APs are selected for the analysis. spike interval (SI) between 1 and 2 spikes/SI between 4 and 5)
Spontaneous AP firing	spontaneously active/silent cells (%)	25/75	16	47/53	17	33/67	12			Fisher's exact test	0.0019	n.s.	0.0603
	spontaneous AP firing (Hz)	0.0017±0.00428	15	0.1534±0.238	17	0.00269±0.00478	12		No	Two-sided permutation test	0.018	n.s.	n.s.		includes spontaneously inactive cells
Up-/down states	up-state duration (s)	0.436±0.038	13	0.385±0.053	19	0.384±0.078	13		No	Mann Whitney Test	0.0083	0.0455	n.s.
	up-state frequency (Hz)	1.085±0.097	13	1.233±0.165	19	1.311±0.225	13		Yes	Unpaired t-test	0.008598	0.003811	n.s.
	up-state Vm (mV)	-69.217±9.18	13	-72.4±8.65	19	-72.006±9.38	13		Yes	Unpaired t-test	n.s.	n.s.	n.s.
	down-state duration (s)	0.442±0.044	13	0.386±0.053	19	0.3796±0.074	13		Yes	Unpaired t-test	0.005284	0.019567	n.s.
	down-state frequency (Hz)	1.088±0.104	13	1.234±0.14	19	1.236±0.24	13		Yes	Unpaired t-test	0.003786	n.s.	n.s.
	down-state Vm (mV)	-72.02±9.048	13	-77.79±9.66	19	-77.518±8.788	13		No	Unpaired t-test	n.s.	n.s.	n.s.
	Vm difference between up-down-state (mV)	-2.805±1.35	13	-5.385±3.28	19	-5.512±2.396	13		No	Mann Whitney Test	0.02852	0.0041	n.s.
	SD of VM up-states	0.851±0.240	13	1.415±0.691	19	1.475±0.567	19		No	Mann Whitney Test	0.0140633	0.00293601	n.s.
Power-frequency spectrum	delta (mV2/Hz)	3.225±2.67	13	11.98±12.6	19	11.077±9.14	13		No	Mann Whitney Test	0.02382	0.0056	n.s.
	theta (mV2/Hz)	0.208±0.15	12	1.075±0.92	18	0.843±0.586	12		No	Mann Whitney Test	0.0009	0.002	n.s.
	alpha (mV2/Hz)	0.0698±0.05	12	0.383±0.26	18	0.262±0.211	13		No	Mann Whitney Test	0.0001	0.003	n.s.
	beta (mV2/Hz)	0.093±0.084	13	0.339±0.30	18	0.247±0.166	13		No	Mann Whitney Test	0.00168	0.0035	n.s.
	gamma (mV2/Hz)	0.048±0.042	13	0.180±0.204	18	0.1296±0.090	13		No	Mann Whitney Test	0.00694	0.01208	n.s.
EPSP-only cells	EPSP amplitude (mV)	5.918±3.07	16	10.67±5.685	23	6.227±1.364	10		No	Unpaired t-test	0.0008	n.s.	0.00652
	EPSP half-width (ms)	29.35±6.29	14	46.89±16.20	24	27.557±10.151	10		No	Unpaired t-test	0.0006	n.s.	0.00298
	EPSP slope (mV/ms)	0.3967±0.33	16	0.579±0.36	24	0.483±0.472	11		No	Mann Whitney Test	0.0394	n.s.	n.s.
	EPSP onset latency (ms)	19.32±6.52	16	13.797±3.37	23	17.018±5.146	11		No	Unpaired t-test	0.00018	n.s.	n.s.
	EPSP peak latency (ms)	57.151±21.089	15	56.893±21.11	23	70.736±30.871	11		No	Mann Whitney Test	n.s.	n.s.	n.s.
	failures (n)	5.58±2.9	12	12.583±9.18	24	13.55±8.25	11		No	Mann Whitney Test	n.s. (0.07)	n.s.	n.s.
AP-EPSP cells	First AP peak latency (ms)	55.99±41.41	14	48.96±34.43	16	Not enough cells for analysis	-		No	Mann Whitney Test	n.s.	-	-
	% of proportion of AP/EPSP/Failure	24/70/6	14	54/40/6	16	Not enough cells for analysis	-			Chi-square (3x3)	0.02	-	-
	Pre APs (200 ms before the stim)	0.0107±0.018	14	0.106±0.17	16	Not enough cells for analysis	-		Yes	Paired t-test	0.0001	-	-
	Post APs (200 ms after the stim)	0.25±0.196	14	0.651±0.44	16	Not enough cells for analysis	-		Yes	Paired t-test	0.0006	-	-
	evoked APs/40 trials	0.239±0.192	14	0.545±0.367	16	Not enough cells for analysis	-		No	Mann Whitney Test	0.03	-	-
	APs per successful trial	1.048±0.098	14	1.181±0.215	16	Not enough cells for analysis	-		No	Mann Whitney Test	n.s.	-	-
	coefficient of variation	2.312±1.046	14	1.478±1.2309	16	Not enough cells for analysis	-		No	Mann Whitney Test	0.02	-	-
AP jitter	Average AP delay (ms)	37.05±8.65	13	38.86±11.62	16	Not enough cells for analysis	-		Yes	Unpaired t-test	n.s	-	-
Additional noise measures	Vm fluctuation (mV)	1.67±0.93	16	2.93±1.6	23	2.455±0.97	11		No	Mann Whitney Test	0.0232	0.0278	n.s.		SD of Vm during 200-ms-window before onset of stimulus
	SNR*	6.072±1.547	15	6.696±2.503	23	4.515±1.64	10		No	Mann Whitney Test	n.s.	0.02444	0.03318		EPSP amplitude divided by Vm fluctuation
Trial-by-trial variability	SD EPSP amplitude (mV)	2.97±1.46	16	4.79±2.42	23	5.302±1.514	11		No	Mann Whitney Test	0.00578	0.00174	n.s.
	SD EPSP half-width (ms)	18.85±7.54	15	33.45±21.44	24	26.709±9.14	11		No	Mann Whitney Test	0.01878	0.02926	n.s.
	SD EPSP slope (mV/ms)	0.26±0.138	15	0.48±0.28	24	0.30±0.26	13		No	Mann Whitney Test	0.00988	n.s.	0.04036
	SD EPSP peak latency (ms)	33.60±29.38	16	34.94±25.43	23	44.40±24.65	13		No	Mann Whitney Test	n.s.	n.s.	n.s.
	SD SNR*	9.18±5.52	16	6.02±3.65	23	8.01±4..49	12		No	Mann Whitney Test	0.03572	n.s.	n.s.
	SD PSD	0.0198±0.016	16	0.0752±0.0676	23	0.789±1.187	12		No	Mann Whitney Test	0.00338	0.00012	0.0271
	SD Vm fluctuation (mV)	0.6387±0.3354	16	1.2496±0.784	23	1.117±0.41	11		No	Mann Whitney Test	0.01732	0.0083	n.s.		SD of the SD of Vm during 200-ms-window before onset of stimulus
	SD onset latency	6.091±3.81	16	5.054±5	22	7.425±5.63	10		No	Mann Whitney Test	n.s	n.s	n.s
	SD peak latency(ms)	13.86±9	16	11.87±5	22	20.26±11.6	10		No	Mann Whitney Test	n.s	n.s	n.s
	(AP-EPSPs) SD AP delay (ms)	1.595±1.40	11	7.96±5.95	16	Not enough cells for analysis			No	Mann Whitney Test	0.002	-	-
	SNR	1.188±1.12	16	0.56±0.365	23	0.262±1.146	10		No	Mann Whitney Test	0.04444	0.0008	0.01428

## Sheet: Variance Analysis
		Variance tests
		Variance (cell-to-cell)
Categories	Parameters	WT	KO	KO-BMS	WT vs KO	WT vs KO-BMS	KO vs KO-BMS	WT vs KO	WT vs KO-BMS	KO vs KO-BMS
Intrinsic excitability	AP halfwidth (ms)	0.250918	0.413024	0.0615223	n.s	n.s	0.0174209	Bartlett test	Bartlett test	Bartlett test
	max AP firing frequency (Hz)	0.226305	45.1211	120.595	n.s	n.s	0.0748243	Bartlett test	Bartlett test	Bartlett test
	ratio 3rd AP/1st AP (half-width)	0.522653	2.72809	0.305307	0.0128745	0.00754258	0.00806785	Bartlett test	Bartlett test	Bartlett test
	ADP (mV)	0.358222	0.325706	3.29961	n.s	0.0321347	0.015808	Levene test	Levene test	Levene test
Spontaneous AP firing	spontaneous AP firing (Hz)	1.83772e-05	0.0569265	2.28433e-05	1.14174e-05	n.s	7.56133e-05	Levene test	Levene test	Levene test
Up-/down states	up-state duration (s)	0.00141211	0.00285637	0.00614323	n.s	0.0166358	n.s	Bartlett test	Bartlett test	Bartlett test
	up-state frequency (Hz)	0.00945111	0.0271701	0.0504467	0.0683009	0.00697302	n.s	Bartlett test	Bartlett test	Bartlett test
	up-state Vm (mV)	84.4221	74.7694	87.9588	n.s	n.s	n.s	Bartlett test	Bartlett test	Bartlett test
	down-state duration (s)	0.00194961	0.00281215	0.00547595	n.s	n.s	n.s	Bartlett test	Bartlett test	Bartlett test
	down-state frequency (Hz)	0.0108171	0.0189421	0.0575077	n.s	0.00709626	0.0320383	Bartlett test	Bartlett test	Bartlett test
	down-state Vm (mV)	81.8676	93.3265	77.4147	n.s	n.s	n.s	Bartlett test	Bartlett test	Bartlett test
	up-down-state Vm diff (mV)	1.83566	10.7763	5.73972	0.0035	0.0593233	n.s	Bartlett test	Bartlett test	Bartlett test
Power-frequency spectrum	delta	7.15151	158.981	83.5333	0.00056956	0.00654662	n.s	Levene test	Levene test	Levene test
	theta	0.0224359	0.840142	0.342872	0.00017745	8.52941e-05	n.s	Levene test	Bartlett test	Levene test
	alpha	0.00266788	0.0710703	0.0448199	3.23069e-06	0.000766857	n.s	Bartlett test	Levene test	Levene test
	beta	0.00699143	0.0906019	0.0274367	0.0187823	0.042471	n.s	Levene test	Levene test	Levene test
	gamma	0.00173684	0.0418865	0.00815303	0.0151105	0.0389821	n.s	Levene test	Levene test	Levene test
EPSP-only cells	EPSP amplitude (mV)	9.42683	18.983	1.86101	n.s	0.0190448	0.00114439	Bartlett test	Bartlett test	Bartlett test
	EPSP half-width (ms)	91.3885	262.639	103.041	0.0459696	n.s	n.s	Bartlett test	Bartlett test	Bartlett test
	EPSP slope (mV/ms)	0.112116	0.133257	0.222948	n.s	n.s	n.s	Levene test	Levene test	Levene test
	EPSP onset latency (ms)	42.5374	11.4044	26.4779	0.00512271	n.s	n.s	Bartlett test	Bartlett test	Bartlett test
	EPSP peak latency (ms)	444.786	445.648	953.027	n.s	n.s	n.s	Bartlett test	Bartlett test	Bartlett test
AP-EPSP cells	evoked APs/40 trials	0.00839015	0.144102	-	1.64826e-05			F-test
AP jitter	Average AP delay (ms)	81.2112	143.911	-	n.s			F-test
Additional noise measures	baseline Vm fluctuation (mV)	0.867685	2.56202	0.941751	0.000802757	n.s	0.00352118	Levene test	Bartlett test	Levene test
Trial-by-trial variability	SNR	1.26792	0.133599	0.0212999	0.000563749	0.00266788	0.0225437	Levene test	Levene test	Levene test
